# Supplementary material for: Constructing anisotropic conical graphene aerogels with concentric annular structures for highly thermally conductive phase change composites towards efficient solar–thermal–electric energy conversion
Source: Royal Society of Chemistry journal article supplement (doi:10.1039/d2ta06457j), 2022-01-01
Supplement: d2ta06457j1.pdf [file d2ta06457j1.pdf]

## Supporting Information

### **Constructing anisotropic conical graphene aerogels with concentric annular structures for highly thermally conductive phase change composites towards efficient solar-thermal-electric energy conversion**

Hao-Yu Zhao,<sup>ab</sup> Chao Shu,<sup>a</sup> Peng Min,<sup>b</sup> Changjun Li,<sup>a</sup> Wenchao Deng,<sup>b</sup> Jing Yang,<sup>c</sup> Xiaofeng Li<sup>\*a</sup> and Zhong-Zhen Yu<sup>\*b</sup>

<sup>a</sup> Beijing Key Laboratory of Advanced Functional Polymer Composites, Beijing University of Chemical Technology, Beijing 100029, China

<sup>b</sup> State Key Laboratory of Organic-Inorganic Composites, College of Materials Science and Engineering, Beijing University of Chemical Technology, Beijing 100029, China

<sup>c</sup> College of Chemistry and Chemical Engineering, Hunan Normal University, Changsha 410081, China

\*E-mails: [xfli@mail.buct.edu.cn](mailto:xfli@mail.buct.edu.cn) (X. Li); [yuzz@mail.buct.edu.cn](mailto:yuzz@mail.buct.edu.cn) (Z.-Z. Yu)

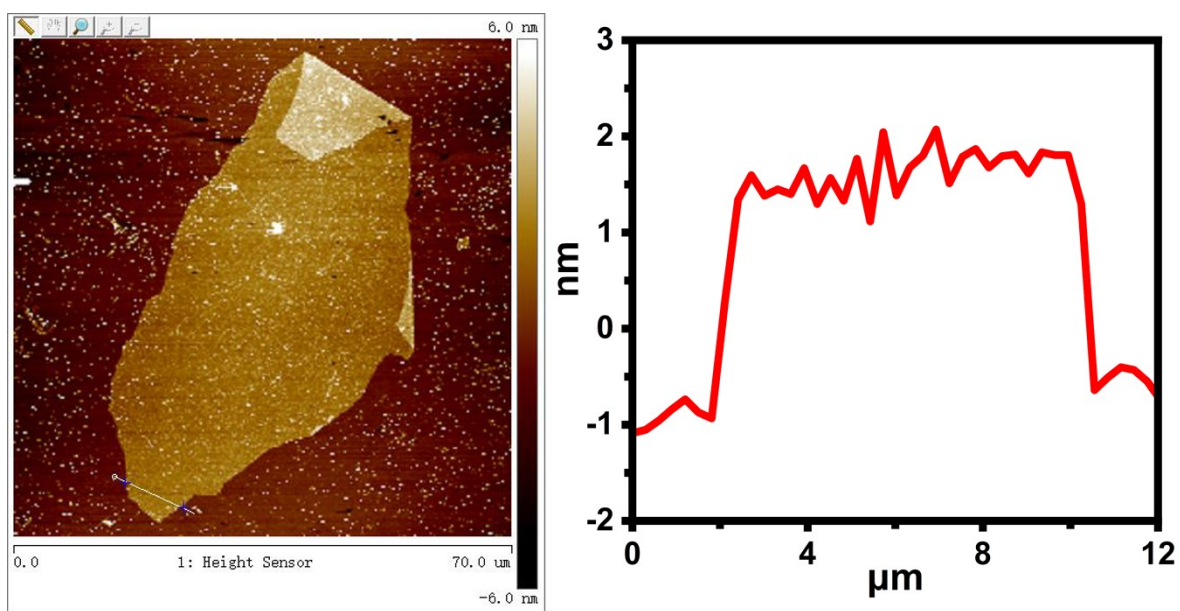

**Fig. S1** AFM image and height profile of GO.

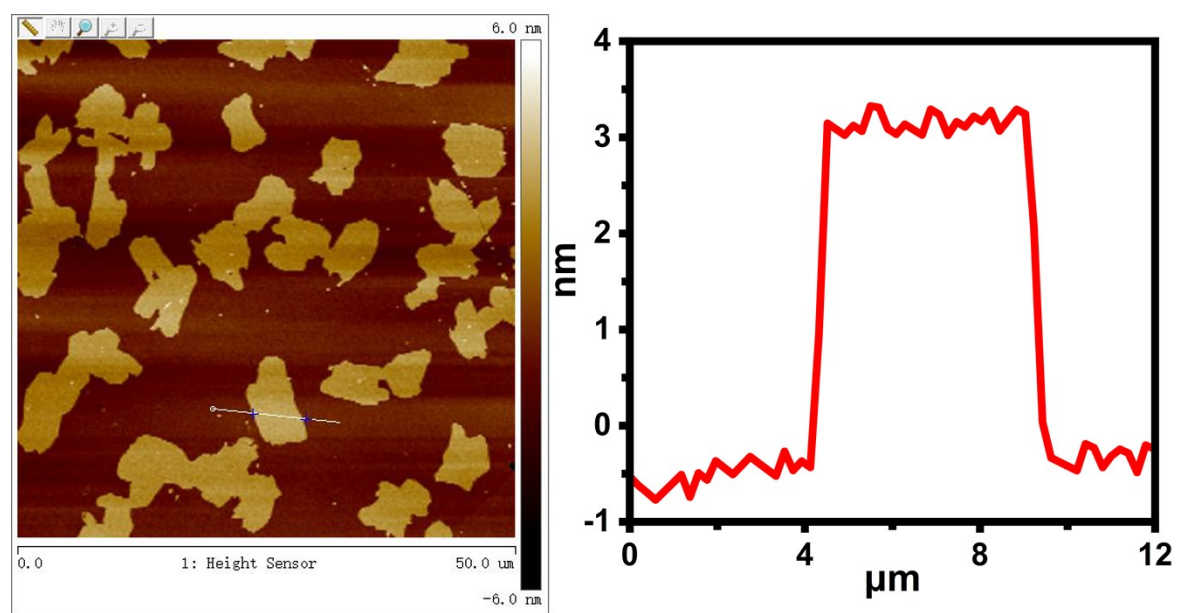

**Fig. S2** AFM image and height profile of GNPs.

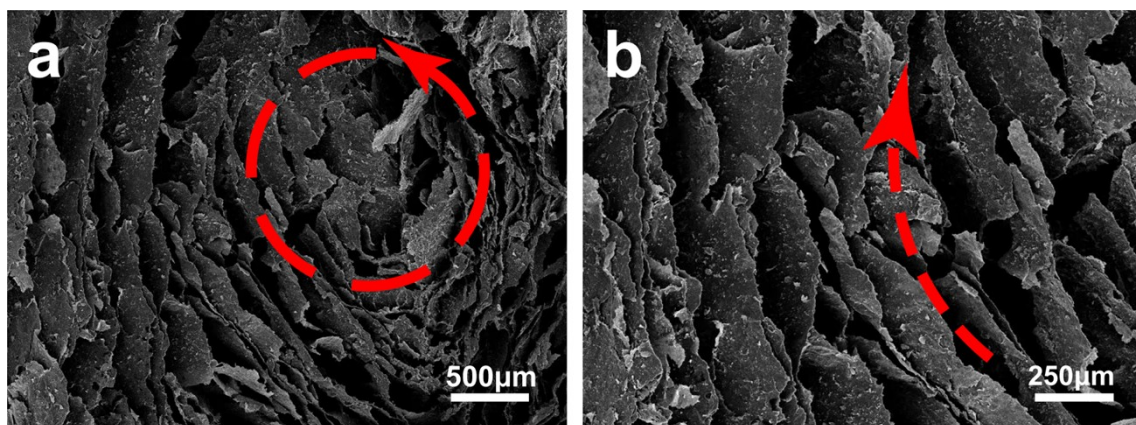

**Fig. S3** (a, b) Low-magnification SEM images of HCGA2.

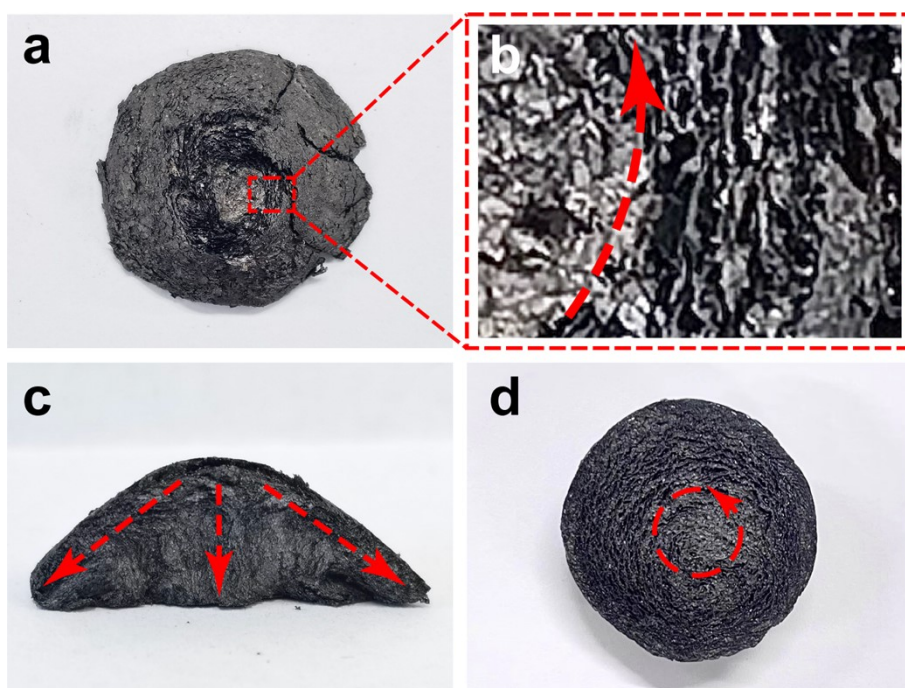

**Fig. S4** Digital photographs of (a, b) cross-section, and (c) side-section of HCGA2. (d) Digital photograph of the bottom of HCGA2/tetradecanol.

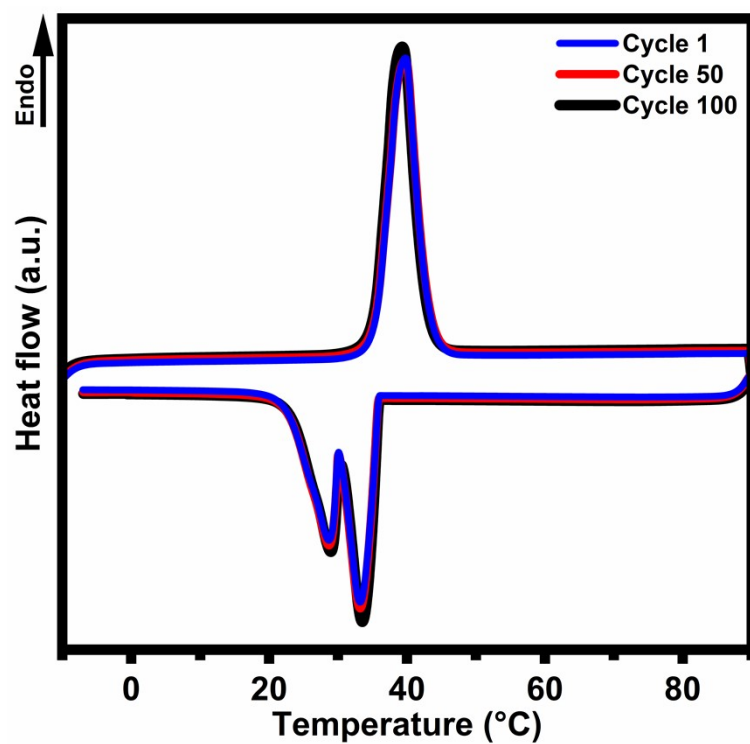

**Fig. S5** DSC curves of the HCGA2/tetradecanol at 1st, 50th and 100th heating-cooling cycles.

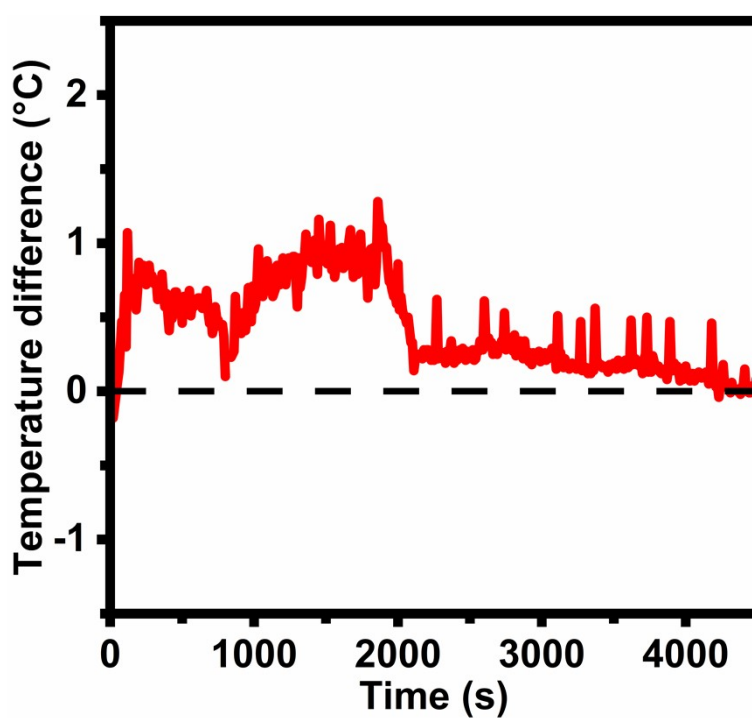

**Fig. S6** Temperature differences between the bottom and the top of the HCGA2/tetradecanol during the solar-thermal energy conversion measurement.

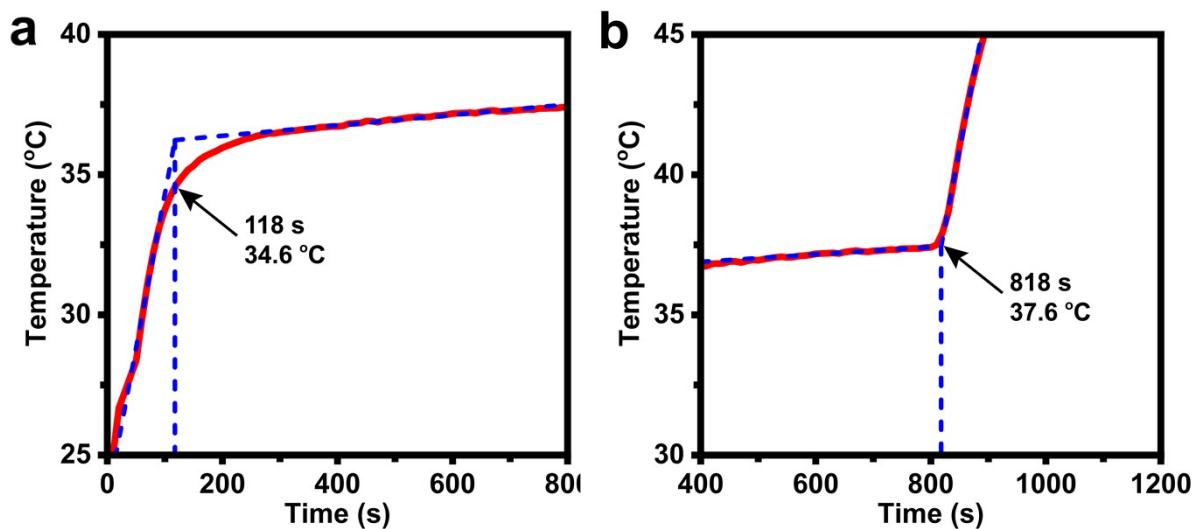

Fig. S7 Determination of (a) beginning position and (b) ending position of the melting process of HCGA2/tetradecanol during solar-thermal conversion by a linear fitting method.

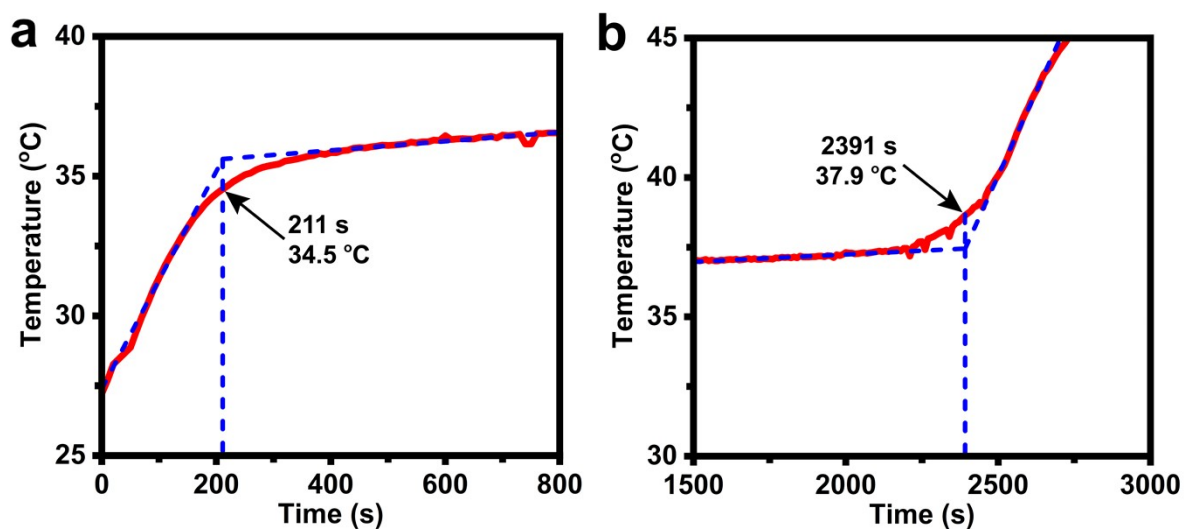

Fig. S8 Determination of (a) beginning position and (b) ending position of the melting process of HGA2/tetradecanol during solar-thermal conversion by a linear fitting method.



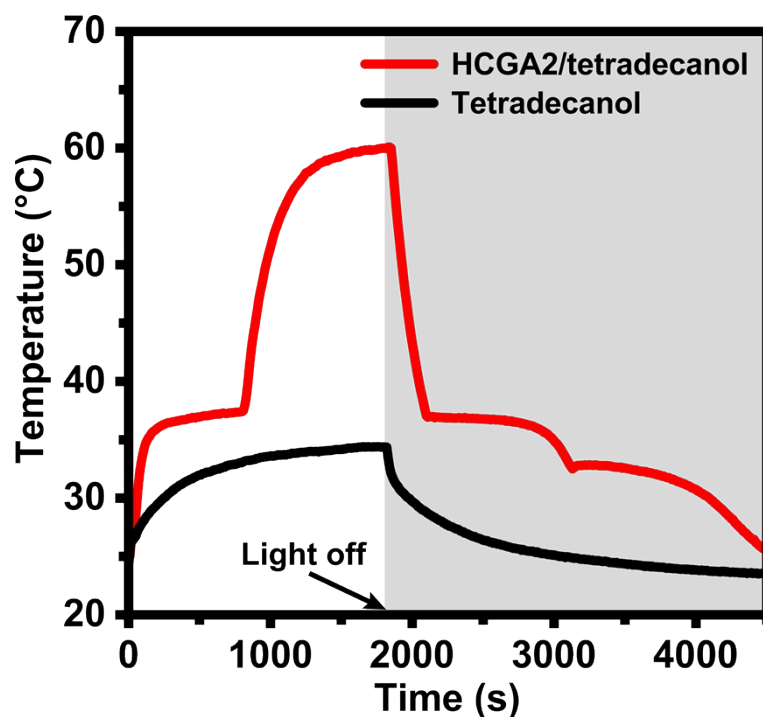

**Fig. S9** Temperature-time curves of the bottom of HCGA2/tetradecanol and tetradecanol under a solar light intensity of  $100 \text{ mW cm}^{-2}$ .

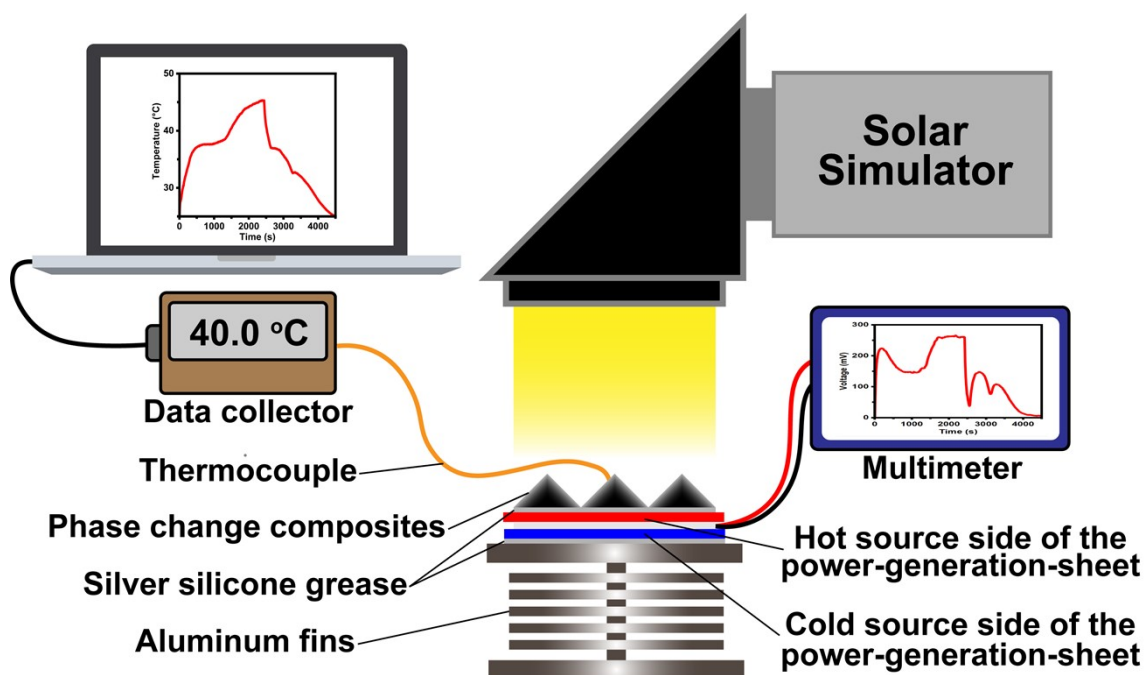

**Fig. S10** Schematic of the components and their connections in the solar-thermal-electric energy conversion measurements.

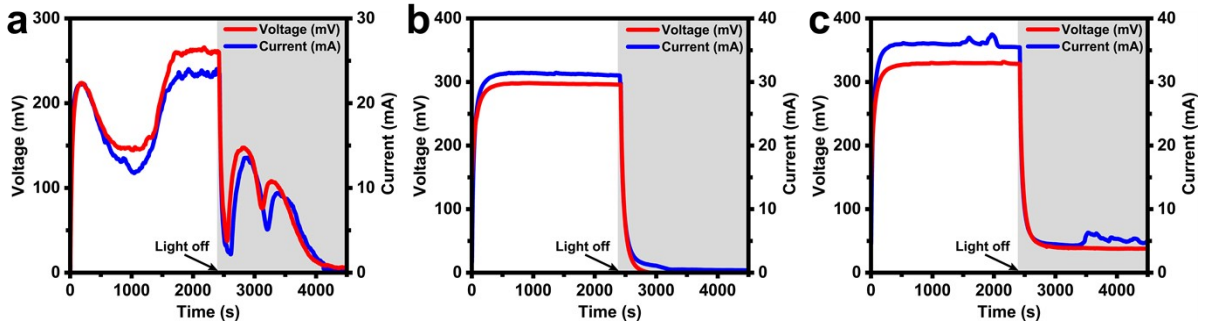

**Fig. S11** Voltage-time curves and current-time curves of the STE generator under a solar light intensity of  $100 \text{ mW cm}^{-2}$  when the aluminum fins were placed in (a) air, (b) water and (c) ice water.

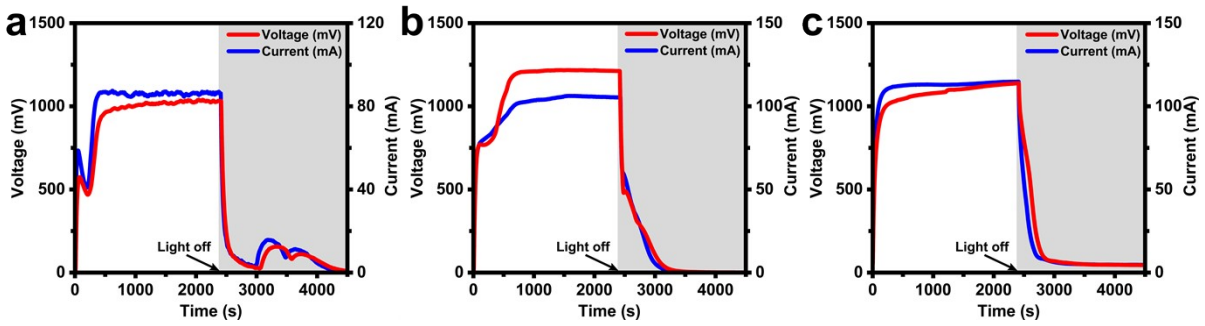

**Fig. S12** Voltage-time curves and current-time curves of the STE generator under a solar light intensity of  $500 \text{ mW cm}^{-2}$  when the aluminum fins were placed in (a) air, (b) water and (c) ice water.

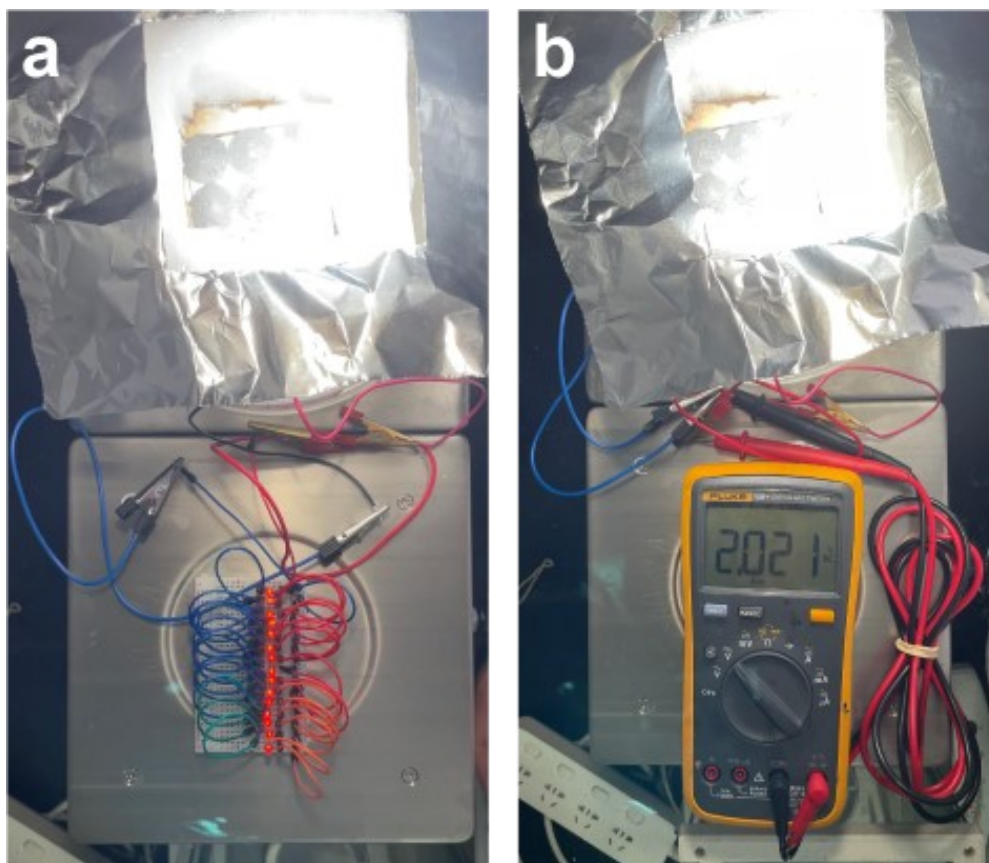

**Fig. S13** Digital photographs of (a) LED bulbs lit by the STE generator under a solar light intensity of  $1200 \text{ mW cm}^{-2}$ , and (b) the output voltage at that moment.

**Table S1**  $T_m$ ,  $\Delta H_m$ ,  $T_c$  and  $\Delta H_c$  of tetradecanol, HCGA1/tetradecanol and HCGA2/tetradecanol.

| Samples            | $T_m$ (°C) | $\Delta H_m$ (J g <sup>-1</sup> ) | $T_c$ (°C) | $\Delta H_c$ (J g <sup>-1</sup> ) |
|--------------------|------------|-----------------------------------|------------|-----------------------------------|
| Tetradecanol       | 35.6       | 218.0                             | 35.8       | 212.3                             |
| HCGA1/tetradecanol | 35.4       | 212.8                             | 36.0       | 206.2                             |
| HCGA2/tetradecanol | 35.8       | 206.1                             | 36.2       | 198.4                             |



**Table S2** Comparison of maximum output voltages and output currents of the STE generators under certain solar light intensities in this work with those reported in the literature.

| Light intensity<br>(mW cm <sup>-2</sup> ) | Maximum output<br>voltage (mV) | Maximum output<br>current (mA) | Ref.             |
|-------------------------------------------|--------------------------------|--------------------------------|------------------|
| Concentrated light by a convex lens       | 251                            | 64.2                           | 1                |
| Concentrated light by a convex lens       | 3410                           | 191                            | 2                |
| 400                                       | /                              | ~25                            | 3                |
| 800                                       | /                              | ~44                            | 3                |
| 800                                       | /                              | ~27                            | 4                |
| 800                                       | /                              | ~32                            | 5                |
| 100                                       | 160                            | /                              | 6                |
| 150                                       | 210                            | /                              | 6                |
| 300                                       | /                              | ~23                            | 7                |
| 400                                       | /                              | ~27                            | 7                |
| 800                                       | /                              | ~28                            | 7                |
| 200                                       | ~144                           | ~14.8                          | 8                |
| <b>100</b>                                | <b>~330</b>                    | <b>~36</b>                     | <b>This work</b> |
| <b>500</b>                                | <b>~1214</b>                   | <b>~114</b>                    | <b>This work</b> |

## References

1. D. Liu, C. Lei, K. Wu and Q. Fu, *ACS Nano*, 2020, **14**, 15738-15747.
2. Y. Zhang, K. Wu and Q. Fu, *Adv. Funct. Mater.*, 2021, **32**, 2109255.
3. J. Yang, L.-S. Tang, R.-Y. Bao, L. Bai, Z.-Y. Liu, W. Yang, B.-H. Xie and M.-B. Yang, *J. Mater. Chem. A*, 2016, **4**, 18841-18851.
4. J. Yang, P. Yu, L. S. Tang, R. Y. Bao, Z. Y. Liu, M. B. Yang and W. Yang, *Nanoscale*, 2017, **9**, 17704-17709.
5. J. Yang, L. S. Tang, R. Y. Bao, L. Bai, Z. Y. Liu, B. H. Xie, M. B. Yang and W. Yang, *Sol. Energy Mater. Sol. Cells*, 2018, **174**, 56-64.
6. L. Zhang, R. Li, B. Tang and P. Wang, *Nanoscale*, 2016, **8**, 14600-14607.
7. J. Yang, L. S. Tang, R. Y. Bao, L. Bai, Z. Y. Liu, W. Yang, B. H. Xie and M. B. Yang, *Chem. Eng. J.*, 2017, **315**, 481-490.
8. R. Cao, D. Sun, L. Wang, Z. Yan, W. Liu, X. Wang and X. Zhang, *J. Mater. Chem. A*, 2020, **8**, 13207-13217.
